# Supplementary material for: Synthesis and characterization of isocyanate-free polyureas
Source: Royal Society of Chemistry journal article supplement (doi:10.1039/c7gc02996a), 2017-11-29
Supplement: c7gc02996a1.pdf [file c7gc02996a1.pdf]

# Synthesis and Characterization of Isocyanate-free Biosourced Polyureas

*Joseph M. Dennis, Limor I. Steinberg, Allison M. Pekkanen, Maruti Hegde and Timothy E.*

*Long\**

Virginia Tech, Department of Chemistry, Macromolecules Innovation Institute (MII)

Blacksburg, Virginia 24061 USA

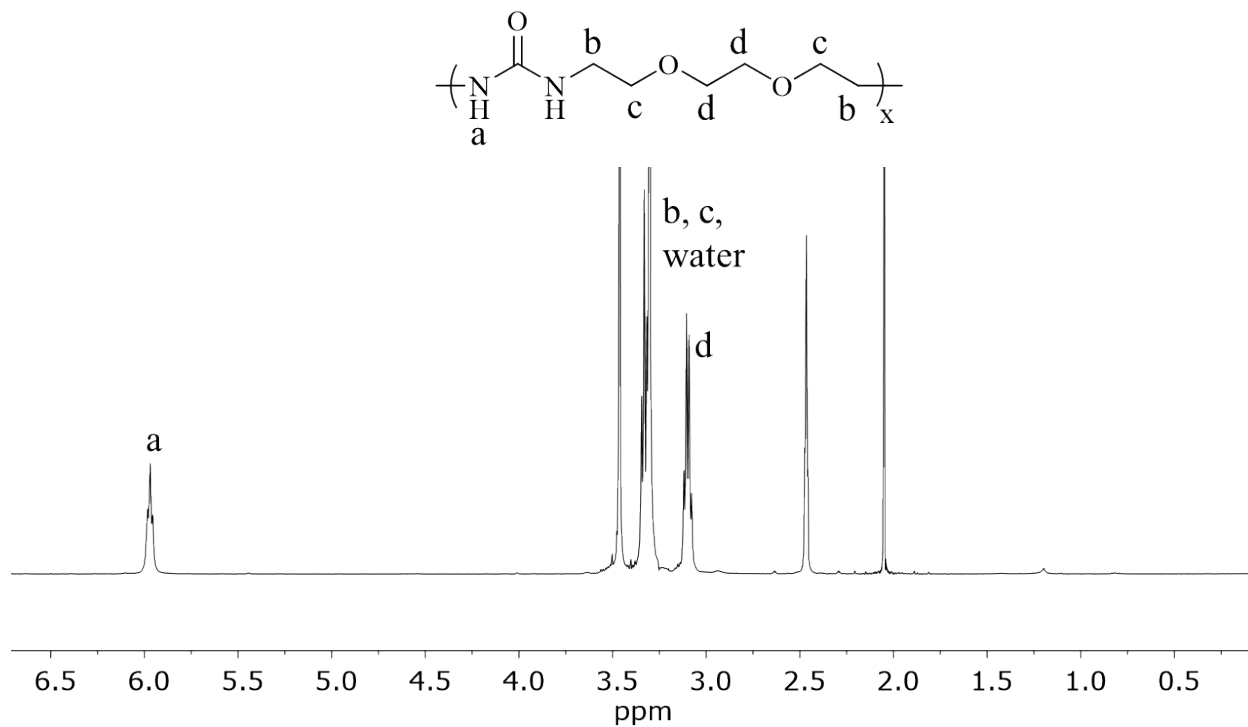

**Figure S1:** <sup>1</sup>H NMR spectroscopy of poly(DEOEU) in DMSO-d<sub>6</sub> with 0.1 M LiBr.

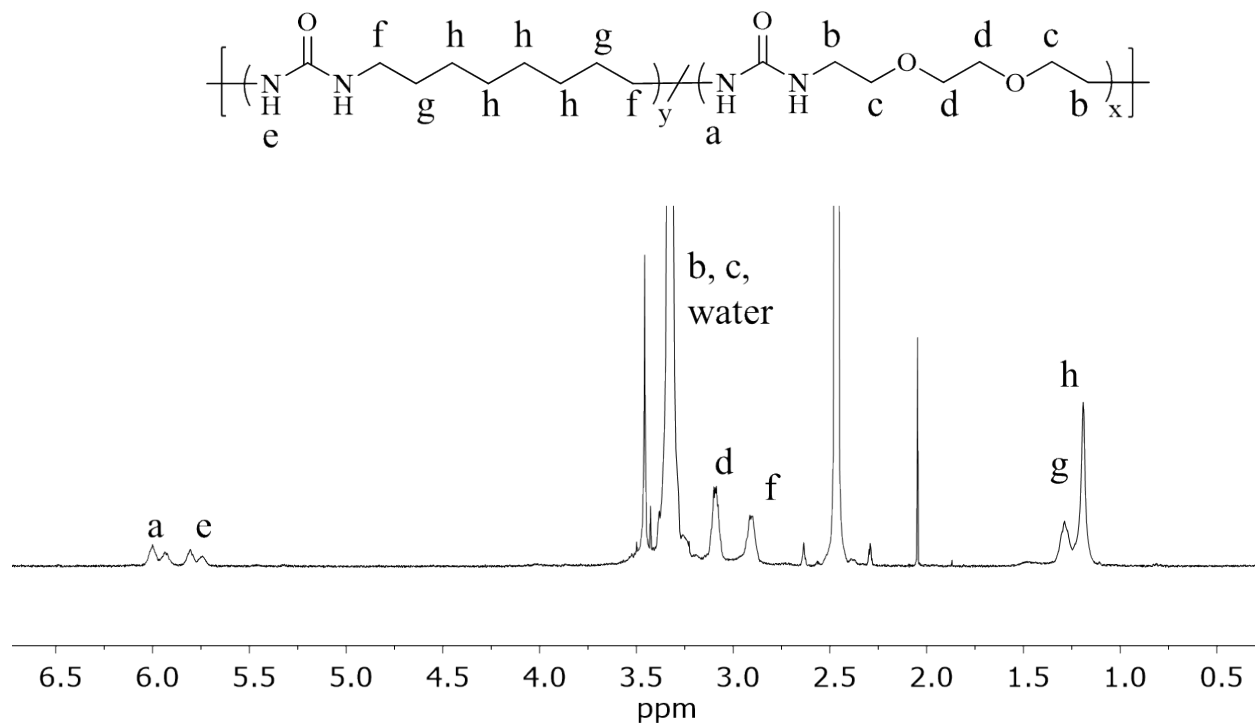

**Figure S2:** <sup>1</sup>H NMR spectroscopy of poly(OMU)<sup>22</sup>-*co*-poly(DEOEU)<sup>78</sup> in DMSO-d<sub>6</sub> with 0.1 M LiBr.

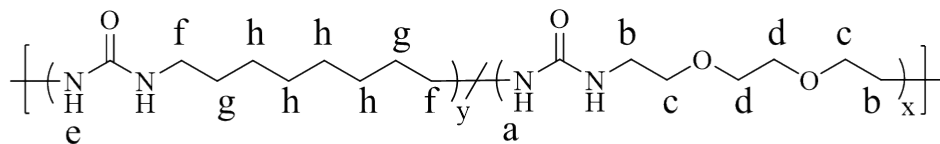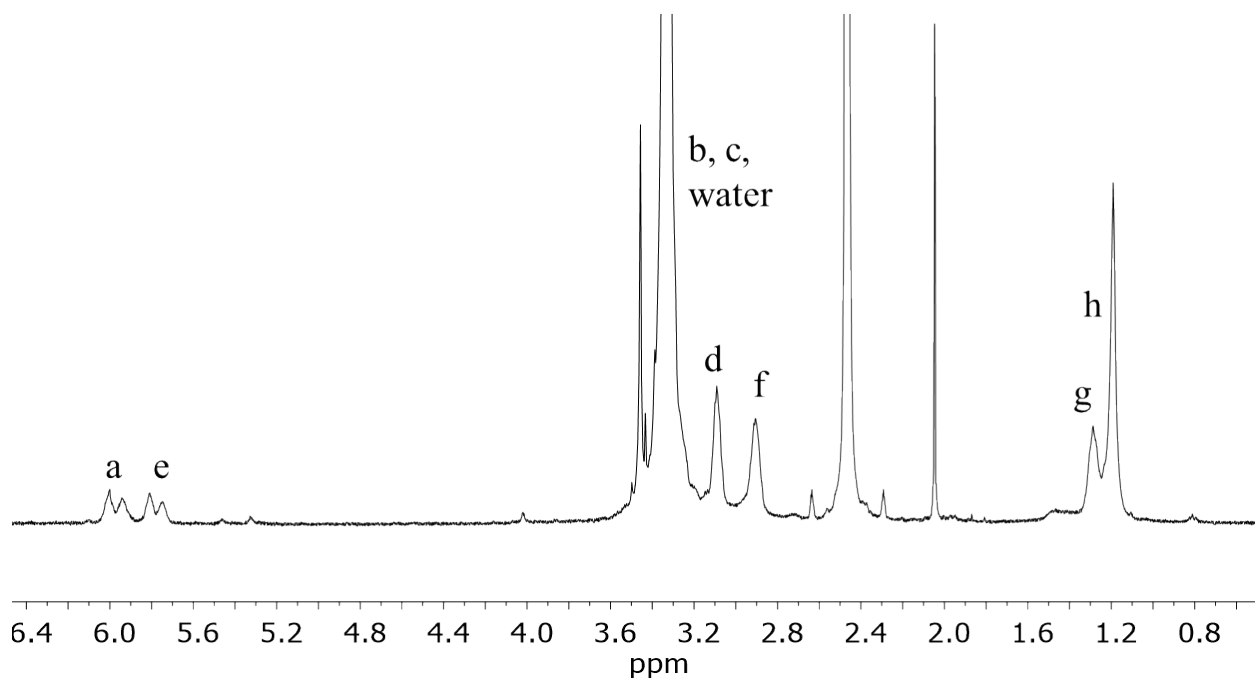

**Figure S3:** <sup>1</sup>H NMR spectroscopy of poly(OMU)<sup>43</sup>-*co*-poly(DEOEU)<sup>57</sup> in DMSO-d<sub>6</sub> with 0.1 M LiBr.

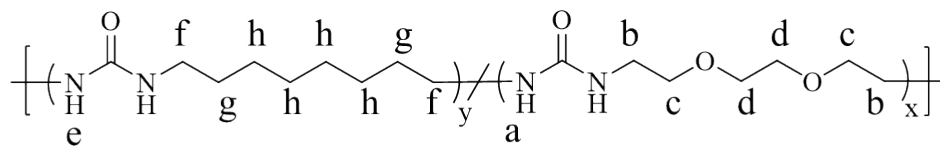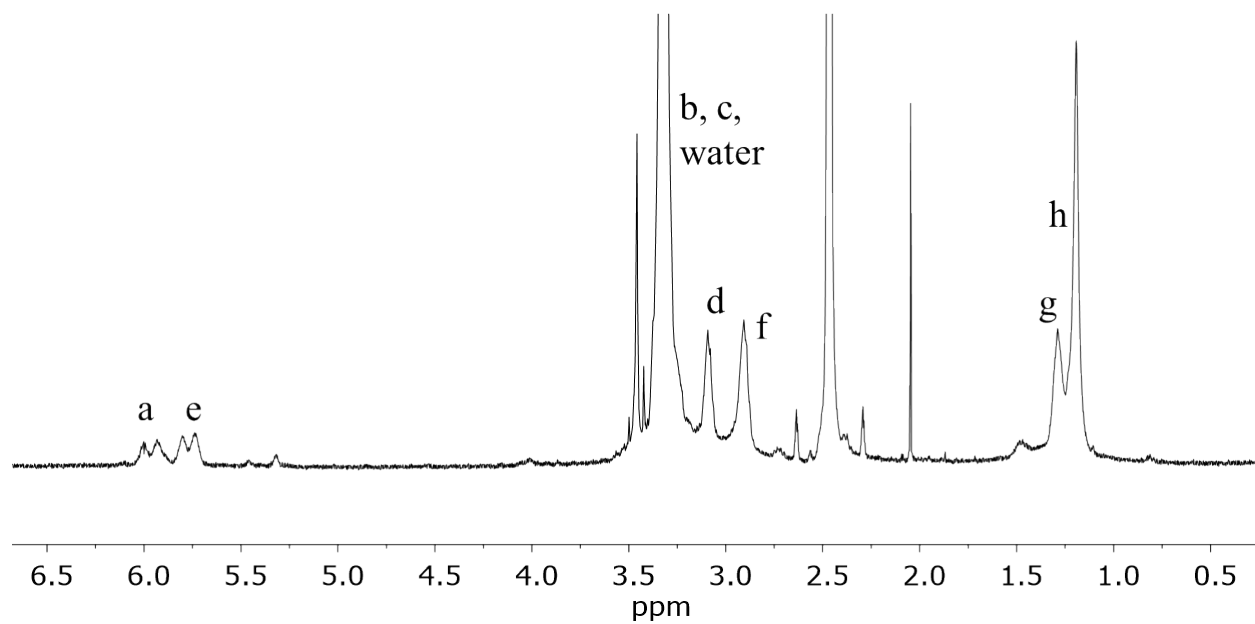

**Figure S4:** <sup>1</sup>H NMR spectroscopy of poly(OMU)<sup>57</sup>-*co*-poly(DEOEU)<sup>43</sup> in DMSO-d<sub>6</sub> with 0.1 M LiBr.

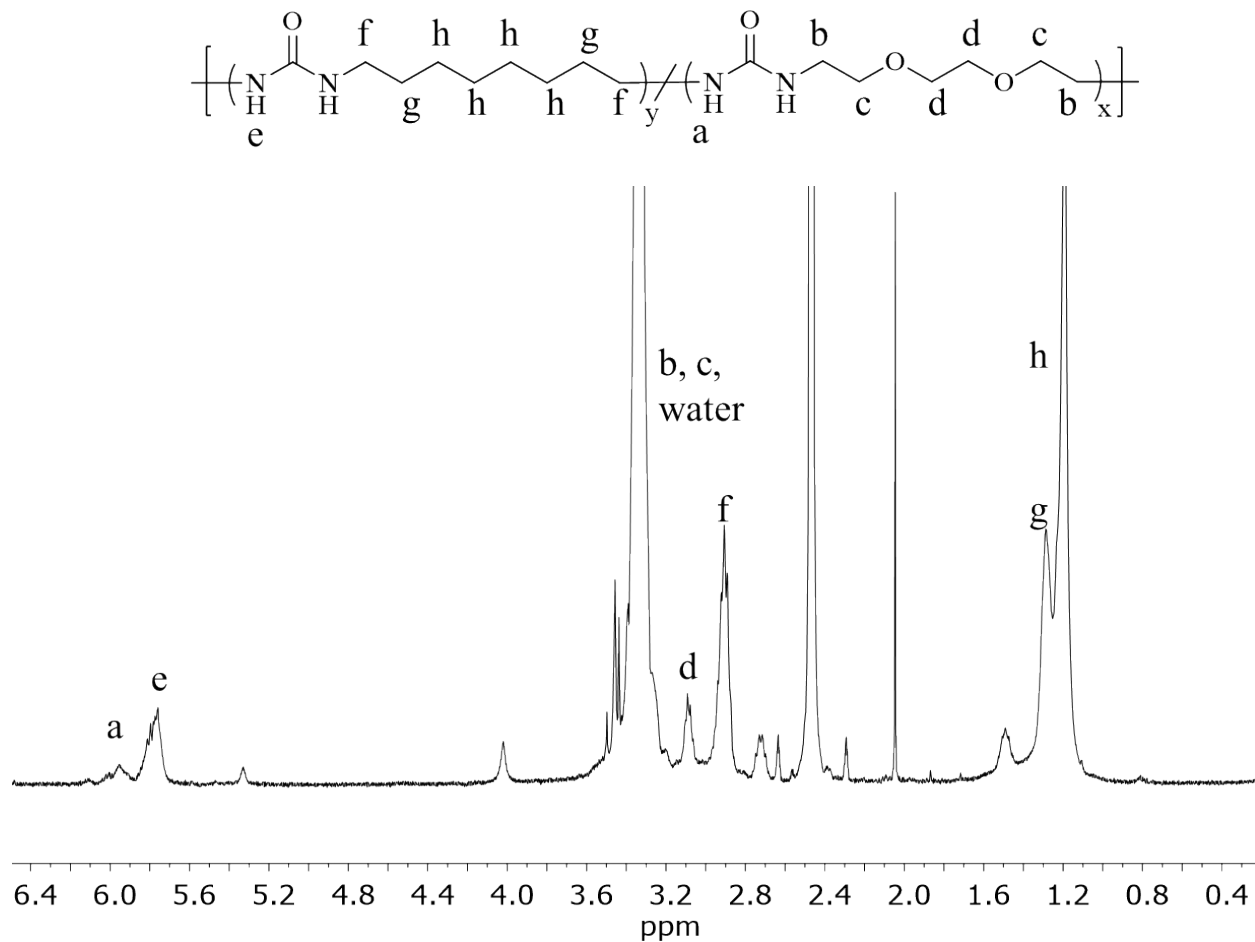

**Figure S4:**  $^1\text{H}$  NMR spectroscopy of poly(OMU)<sup>78</sup>-*co*-poly(DEOEU)<sup>22</sup> in DMSO- $d_6$  with 0.1 M LiBr.

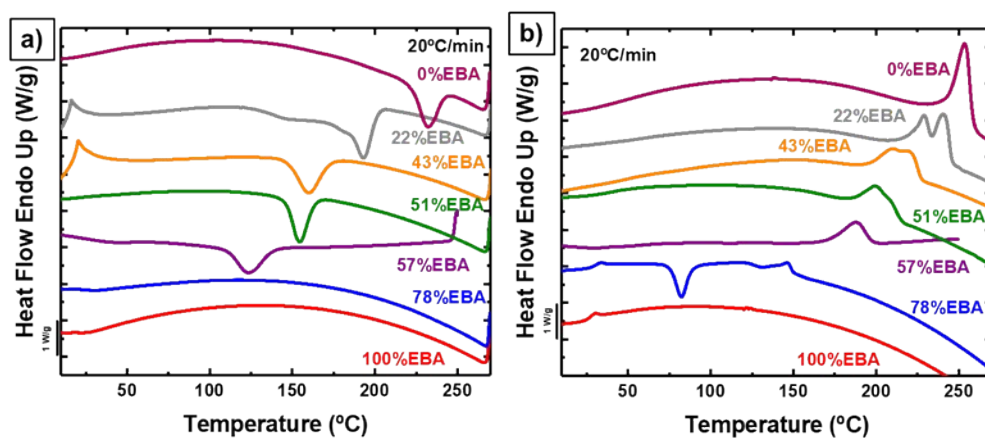

**Figure S5.** (a) DSC cooling scans from the melt at 20 °C/min and (b) subsequent heating scans at 20 °C/min for the indicated homopolymers and random copolymer samples.

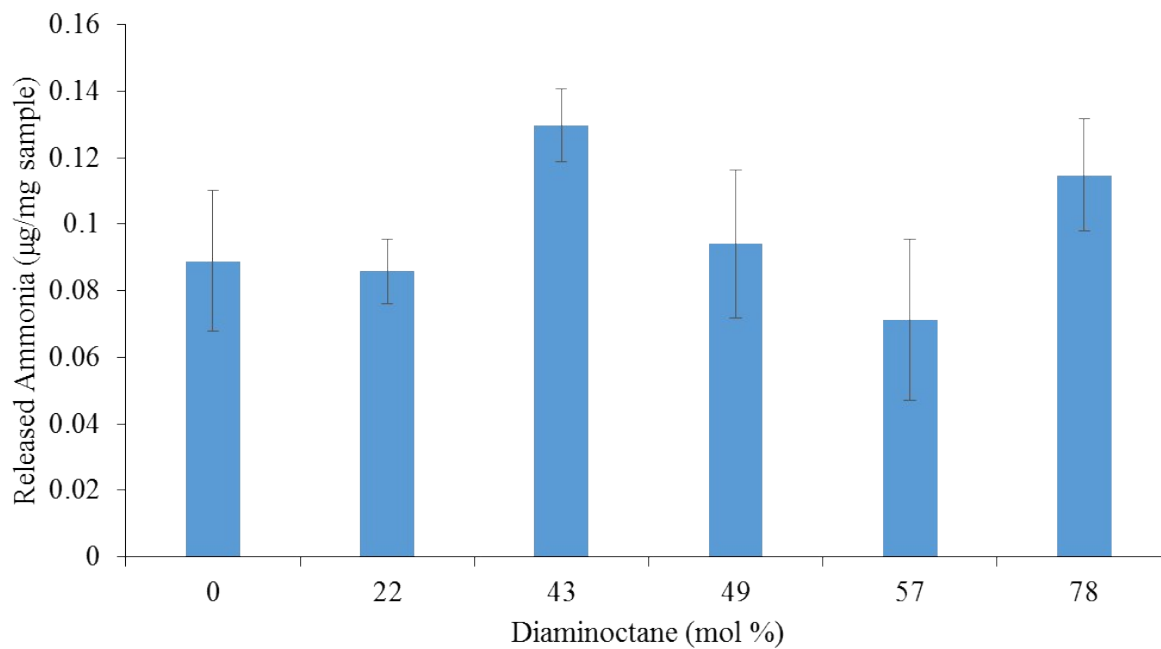

**Figure S6:** Total ammonia release after 4 weeks, identifying a compositional independence of Urease-derived degradation.

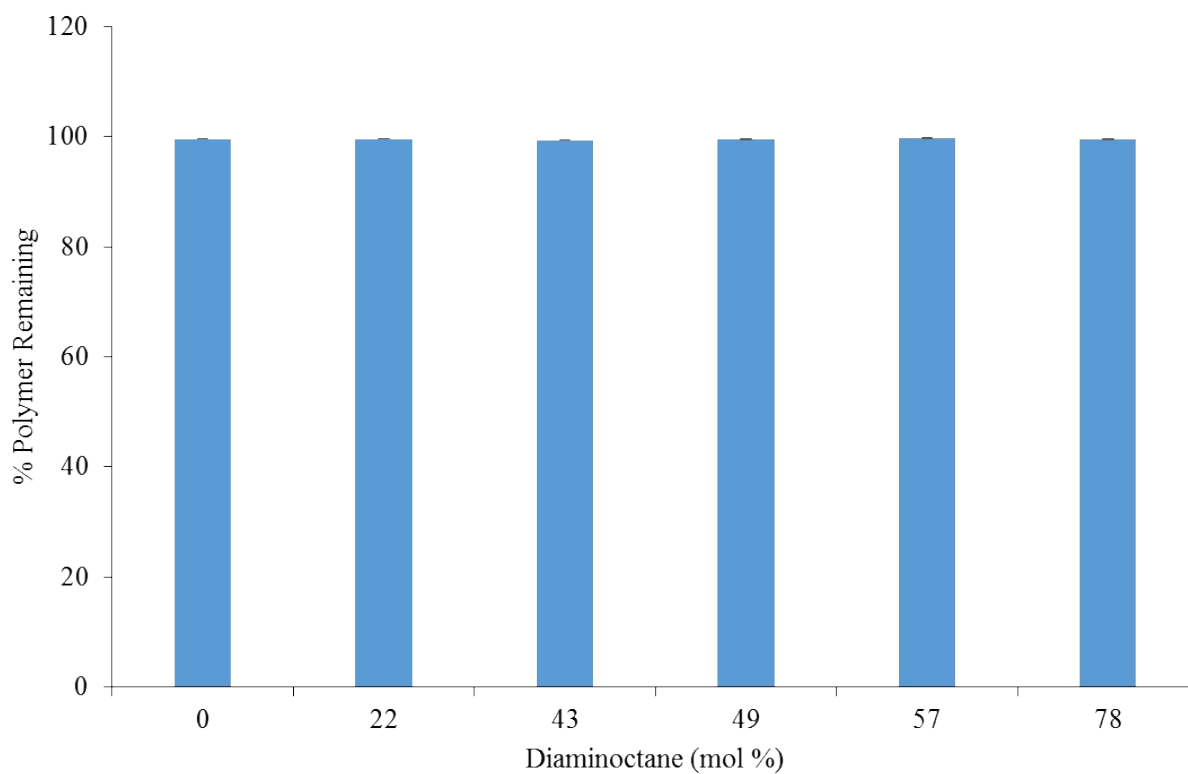

**Figure S7:** Polyurea percent remaining after 4-week exposure to Urease.

**Table S1:** Results of Tukey’s HSD for the 4-week profile of ammonia release . Groups not connected by the same letter are significantly different (i.e. Weeks 3 and 4 are statistically different from weeks 1 and 2)

| WEEK |   | LEAST SQ MEAN |
|------|---|---------------|
| 3    | A | 0.042585      |
| 4    | A | 0.033789      |
| 1    | B | 0.013634      |
| 2    | B | 0.007455      |

**Table S2:** Results of Tukey’s HSD for the total ammonia release after 4 weeks. All copolymers are statistically similar.

| LEVEL |   | LEAST SQ MEAN |
|-------|---|---------------|
| 43    | A | 0.129745      |
| 78    | A | 0.114784      |
| 49    | A | 0.094098      |
| 0     | A | 0.088957      |
| 22    | A | 0.085867      |
| 57    | A | 0.071329      |

**Table S3:** Results of Tukey’s HSD for the percent polymer remaining after 4 weeks indicating similar degradation percentages across the composition range.

| LEVEL |   |   | LEAST SQ MEAN |
|-------|---|---|---------------|
| 57    | A |   | 99.66497      |
| 22    | A | B | 99.59313      |
| 0     | A | B | 99.58475      |
| 49    | A | B | 99.55715      |
| 78    | A | B | 99.46368      |
| 43    |   | B | 99.38846      |
